# Supplementary material for: Factors Associated with Over-the-Counter Analgesic Overuse among Individuals Experiencing Headache
Source: Clin Pract. 2022 Sep 5;12(5):714–22. doi: 10.3390/clinpract12050074 (PMC9498430; doi:10.3390/clinpract12050074)
Supplement: Supplementary file 1 [file clinpract-12-00074-s001.zip › clinpract-1804387-supplementary.pdf]

Questionnaire :

1. Do you have headache
  - a. Yes
  - b. No

**Demographic data:**

2. Gender
  - a. Male
  - b. female
3. Nationality
  - a. Saudi
  - b. No Saudi
4. Do you work
  - a. Yes
  - b. No
5. Did you lose work recently?
  - a. Yes
  - b. No
6. Work sector:
  - a. Public
  - b. Private
  - c. Self business
7. occupation
  - a. education
  - b. trading
  - c. health care
  - d. governmental
  - e. military
8. do you work in more than one job?
  - a. Yes
  - b. No
9. How many hours do you work per day
  - a. Less than 8 hours
  - b. 8-12 hours
  - c. More than 12 hours
10. income
  - a. sufficient
  - b. not sufficient
11. age
12. marital status
  - a. single
  - b. married
  - c. divorce or widow
13. education
  - a. high school
  - b. bachelor degree
  - c. post graduate

- d. other
- 14. children:
  - a. no children
  - b. yes

### **Factors affect headache**

- 15. history of chronic medical disease
  - a. yes
  - b. no
- 16. What is it(mention )?
- 17. sleeping hours
  - a. less than 6 hours
  - b. more than 7 hours
- 18. smoking :
  - a. yes
  - b. no
- 19. any caffeinated beverage do you use :
  - a. yes
  - b. no
- 20. if yes how many cup?
  - a. 1-2 cup
  - b. 3 cups
  - c. more than 4 cups

### **History of headache**

Criteria for medication over use headache

- 21. when did you start getting headache
  - a. 10 years and younger
  - b. 25 years
  - c. 35 years
  - d. 45 years
  - e. 50 years
- 22. how many day do you have headache per month
  - a. less than 15 days
  - b. Equal or more than 15 days/month
- 23. Did you have diagnosis for the headache?
  - a. Yes
  - b. no
- 24. What type of headache
  - a. Tension type headache
  - b. Migraine type
  - c. Cluster headache
  - d. other

- 25. Do you use headache over the counter analgesic ?

- a. Yes
  - b. No
  - c. Sometime
38. if you take the analgesia during the attack what do you take
- a. panadol, fevadol, pandrix ( paracetamol group-nonopioid analgesics )
  - b. ibuprofen diclofenac naproxen ( NSAID group- nonopioid analgesics)
  - c. solpadeine fevadol plus ( paracetamol, codeine caffeine- opioids analgesics )
  - d. relaxon (paracetamol, muscle relaxant)
  - e. other
39. How long do you use the analgesic like paracetamol ibuprofen ergotamine triptan over the past year
- a. One-2 times per week
  - b. 3 times per week
  - c. More than 4 times per week
40. For how long your using the analgesic on this pattern :
- a. Less than 3 months
  - b. More than 3 months
41. How do you get the analgesic?
- a. self-experience
  - b. advertisement flyer
  - c. pharmacist
  - d. family or friend
  - e. doctor
42. If you went to the doctor what specialty did you visit?
- a. Family medicine
  - b. Neurology
  - c. Internal medicine

#### Preventive medicine for headache

43. did you try any medication as preventive medicine for headache
- a. yes
  - b. no
44. If yes , what is it?
- a. amitriptyline
  - b. topamax
  - c. gabapentin
  - d. lyrica
  - e. verapamil
  - f. botox
  - g. other:
  - h. I am not using any medicine
45. Do you still use the preventive medicine ?
- a. Yes
  - b. No

46. if you stop use it why

- a. i had side effect from it
- b. i read the side effect in the pamphlet
- c. i am worry if might cause addiction
- d. my family/ friend advise me to stop it
- e. a doctor advises me to stop it
